# Supplementary material for: An empirical Bayes approach to stochastic blockmodels and graphons: shrinkage estimation and model selection
Source: PeerJ journal article supplement (doi:10.7717/peerj-cs.1006), 2022-07-06
Supplement: S3.pdf [file S3.pdf]

$n = 200$

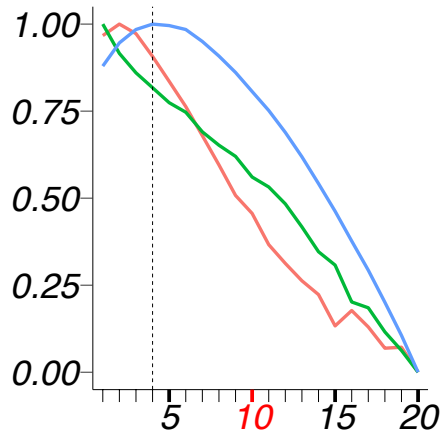

$n = 250$

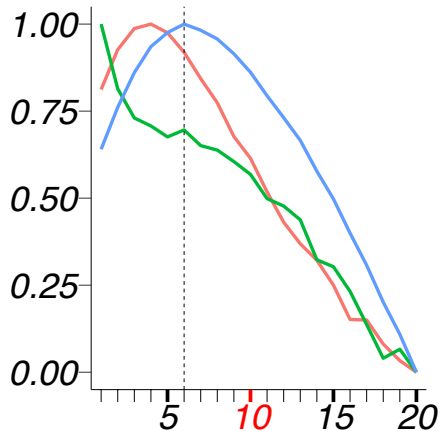

$n = 300$

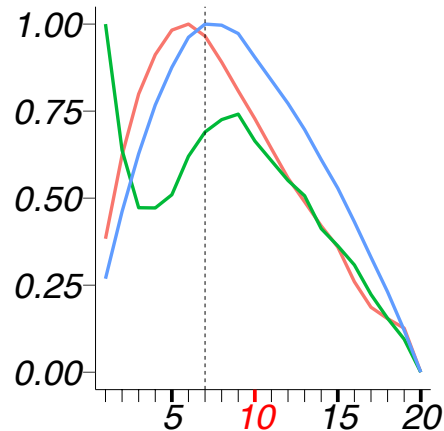

$n = 350$

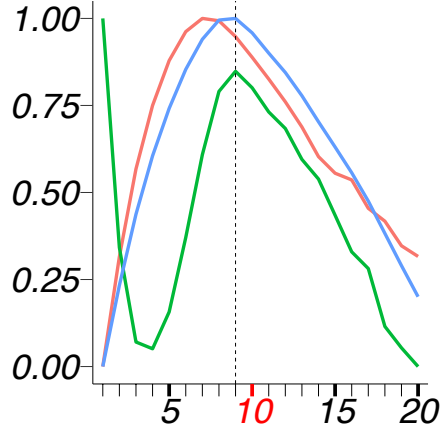

$n = 400$

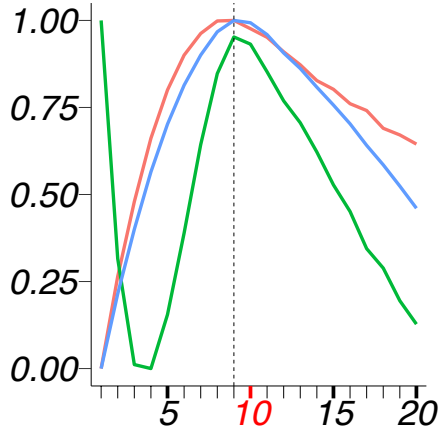

$n = 450$

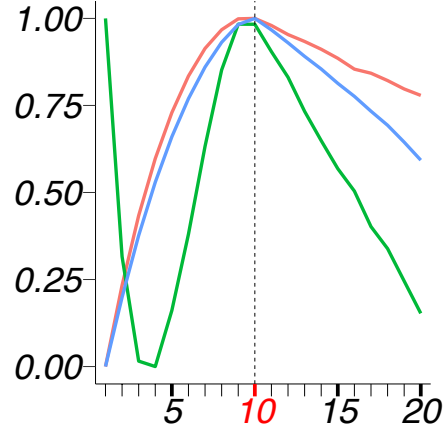

Selection Criteria

K

— CVRP

— EB

— VBEM
