# Supplementary material for: An empirical Bayes approach to stochastic blockmodels and graphons: shrinkage estimation and model selection
Source: PeerJ journal article supplement (doi:10.7717/peerj-cs.1006), 2022-07-06
Supplement: S9.pdf [file S9.pdf]

**value**

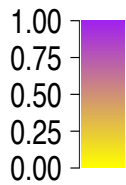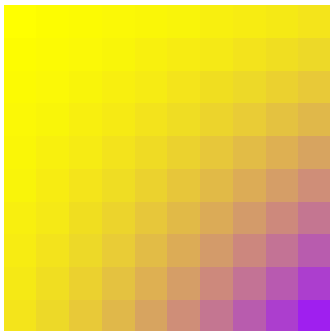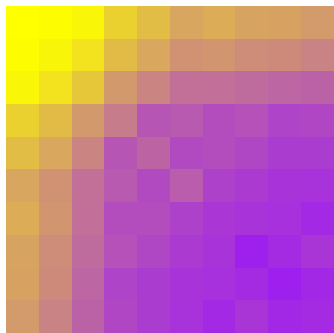

(a)

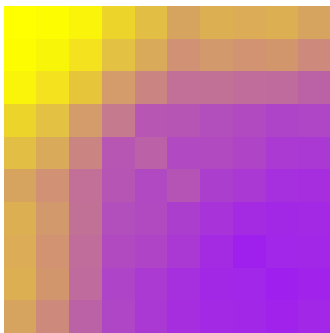

(b)

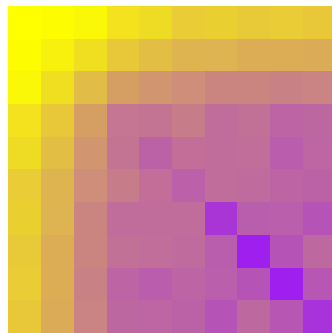

(c)
