# Supplementary material for: An empirical Bayes approach to stochastic blockmodels and graphons: shrinkage estimation and model selection
Source: PeerJ journal article supplement (doi:10.7717/peerj-cs.1006), 2022-07-06
Supplement: supp.pdf [file supp.pdf]

## 1 SUPPLEMENTARY MATERIAL

### 2 VARIATIONAL BAYES EM

As an extension to the work in Daudin et al. [2008], Latouche et al. [2012] proposed a variational Bayes approximation to provide a closed form approximate posterior distribution of the parameters  $(\boldsymbol{\pi}, \Theta)$  and of the latent variables  $\mathbf{Z}$ , where the observed-data log-likelihood can be decomposed into two terms,

$$\ln p(\mathbf{X}) = \mathcal{L}(q(\cdot)) + \text{KL}(q(\cdot) \| p(\cdot | \mathbf{X})), \quad (\text{S1})$$

where

$$\mathcal{L}(q(\cdot)) = \sum_{\mathbf{Z}} \int \int q(\mathbf{Z}, \boldsymbol{\pi}, \Theta) \ln \left\{ \frac{p(\mathbf{X}, \mathbf{Z}, \boldsymbol{\pi}, \Theta)}{q(\mathbf{Z}, \boldsymbol{\pi}, \Theta)} \right\} d\boldsymbol{\pi} d\Theta, \quad (\text{S2})$$

and

$$\text{KL}(q(\cdot) \| p(\cdot | \mathbf{X})) = - \sum_{\mathbf{Z}} \int \int q(\mathbf{Z}, \boldsymbol{\pi}, \Theta) \ln \left\{ \frac{p(\mathbf{Z}, \boldsymbol{\pi}, \Theta | \mathbf{X})}{q(\mathbf{Z}, \boldsymbol{\pi}, \Theta)} \right\} d\boldsymbol{\pi} d\Theta. \quad (\text{S3})$$

3 Minimizing (S3) with respect to  $q(\mathbf{Z}, \boldsymbol{\pi}, \Theta)$  is equivalent to maximizing the lower bound (S2) with  
4 respect to  $q(\mathbf{Z}, \boldsymbol{\pi}, \Theta)$ . However, when considering SBM,  $q(\mathbf{Z}, \boldsymbol{\pi}, \Theta)$  is intractable, thus we can assume  
5 that it can be factorized as

$$q(\mathbf{Z}, \boldsymbol{\pi}, \Theta) = q(\mathbf{Z})q(\boldsymbol{\pi})q(\Theta) = q(\boldsymbol{\pi})q(\Theta) \prod_{i=1}^N q(z_i), \quad (\text{S4})$$

6 where the optimal approximation  $q(z_i)$  at vertex  $i$  follows a multinomial distribution. Latouche et al.  
7 [2012] used a variational Bayes EM (VBEM) algorithm described in Beal and Ghahramani [2003] to  
8 optimize over  $q(z_i)$  and  $q(\boldsymbol{\pi})$ ,  $q(\Theta)$  iteratively.

9 SUPPLEMENTARY FIGURES AND TABLES

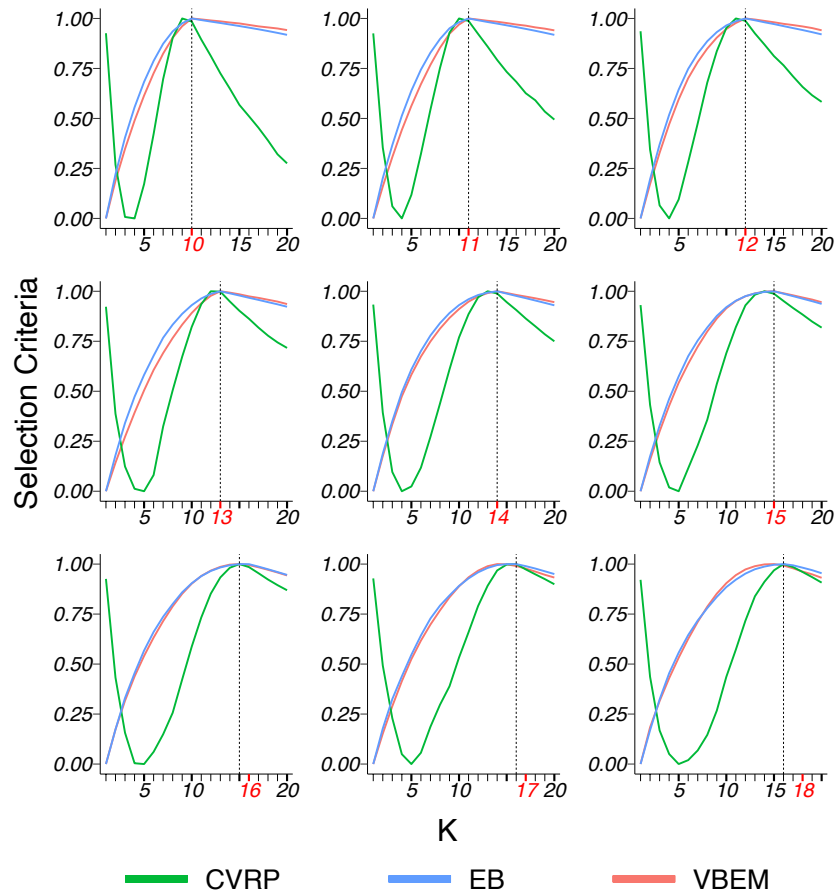

**Figure S1** – Values of model selection criteria in model 1 simulation. The true number of blocks  $K^*$  (marked as red) ranges from 10 to 18 and the results for graphs with each  $K^*$  are shown in a panel.  $\mathcal{I}_{\text{CVRP}}$ ,  $\mathcal{I}_{\text{VBEM}}$ ,  $\mathcal{I}_{\text{EB}}$  are all standardized to  $[0, 1]$ , and  $\mathcal{I}_{\text{CVRP}}$  is taken negative, thus the model is selected by the maximizer of each criterion. For the 100 graphs generated under each set of parameters, the values of three criteria are plotted against the input number of blocks  $K = 1, \dots, 20$  used in clustering. The number of clusters selected by EB is highlighted by the dashed lines.

**Table S1** – MSE values for model 1. The average MSE of the estimates  $\hat{\Theta}$  to  $\Theta$  by the three methods of the 100 graphs generated under different  $K^*$  are shown in each row. The input number of clusters  $K$  ranges from 10 to 18, for each  $K^*$  and  $K$  the minimal MSE among three methods is boldfaced.

| $K^* \setminus K$ | 9           | 10         | 11         | 12         | 13         | 14         | 15         | 16         | 17        | 18         | 19         | 20         |                  |
|-------------------|-------------|------------|------------|------------|------------|------------|------------|------------|-----------|------------|------------|------------|------------------|
| 10 MLE            | 304         | 25         | 35         | 46         | 56         | 67         | 77         | 93         | 109       | 120        | 131        | 148        | $\times 10^{-5}$ |
| 10 VBEM           | 304         | 25         | 36         | 46         | 55         | 66         | 76         | 90         | 106       | 116        | 127        | 143        | $\times 10^{-5}$ |
| 10 EB             | <b>289</b>  | <b>2</b>   | <b>32</b>  | <b>42</b>  | <b>50</b>  | <b>59</b>  | <b>65</b>  | <b>75</b>  | <b>89</b> | <b>94</b>  | <b>105</b> | <b>117</b> | $\times 10^{-5}$ |
| 11 MLE            | 538         | 249        | 30         | 41         | <b>52</b>  | 60         | 72         | 85         | 96        | 112        | 123        | 139        | $\times 10^{-5}$ |
| 11 VBEM           | 538         | 249        | 31         | 41         | <b>52</b>  | 60         | 72         | 85         | 95        | 111        | 120        | 136        | $\times 10^{-5}$ |
| 11 EB             | <b>522</b>  | <b>229</b> | <b>3</b>   | <b>34</b>  | 54         | <b>56</b>  | <b>66</b>  | <b>76</b>  | <b>83</b> | <b>94</b>  | <b>100</b> | <b>111</b> | $\times 10^{-5}$ |
| 12 MLE            | 683         | 417        | 215        | 35         | 44         | 55         | 67         | 79         | 89        | 99         | 112        | 130        | $\times 10^{-5}$ |
| 12 VBEM           | 683         | 417        | 216        | 36         | 45         | 56         | <b>67</b>  | 79         | 89        | 100        | 112        | 129        | $\times 10^{-5}$ |
| 12 EB             | <b>668</b>  | <b>398</b> | <b>192</b> | <b>3</b>   | <b>31</b>  | <b>54</b>  | 70         | <b>76</b>  | <b>81</b> | <b>86</b>  | <b>97</b>  | <b>107</b> | $\times 10^{-5}$ |
| 13 MLE            | 1012        | 708        | 434        | 212        | 41         | 51         | <b>62</b>  | <b>75</b>  | <b>85</b> | <b>98</b>  | 111        | 128        | $\times 10^{-5}$ |
| 13 VBEM           | 1012        | 708        | 434        | 212        | 42         | 52         | 63         | 76         | 86        | 99         | 112        | 128        | $\times 10^{-5}$ |
| 13 EB             | <b>996</b>  | <b>689</b> | <b>410</b> | <b>183</b> | <b>3</b>   | <b>36</b>  | 65         | 85         | 91        | 100        | <b>103</b> | <b>111</b> | $\times 10^{-5}$ |
| 14 MLE            | 921         | 692        | 487        | 305        | 167        | 48         | 60         | 71         | 81        | <b>91</b>  | <b>102</b> | <b>114</b> | $\times 10^{-5}$ |
| 14 VBEM           | 921         | 692        | 488        | 305        | 168        | 49         | 61         | 73         | 82        | 93         | 104        | 116        | $\times 10^{-5}$ |
| 14 EB             | <b>906</b>  | <b>673</b> | <b>464</b> | <b>276</b> | <b>133</b> | <b>3</b>   | <b>43</b>  | <b>65</b>  | <b>79</b> | 94         | <b>102</b> | <b>114</b> | $\times 10^{-5}$ |
| 15 MLE            | 969         | 733        | 543        | 389        | 262        | 149        | 57         | 68         | 78        | <b>88</b>  | <b>99</b>  | <b>114</b> | $\times 10^{-5}$ |
| 15 VBEM           | 969         | 733        | 543        | 390        | 263        | 150        | 58         | 70         | 81        | 91         | 102        | 116        | $\times 10^{-5}$ |
| 15 EB             | <b>953</b>  | <b>712</b> | <b>518</b> | <b>359</b> | <b>227</b> | <b>108</b> | <b>5</b>   | <b>43</b>  | <b>69</b> | 89         | 104        | 120        | $\times 10^{-5}$ |
| 16 MLE            | 1044        | 842        | 653        | 495        | 361        | 237        | 137        | 70         | 77        | 89         | 101        | <b>114</b> | $\times 10^{-5}$ |
| 16 VBEM           | 1044        | 842        | 653        | 495        | 362        | 238        | 138        | 72         | 80        | 92         | 104        | 117        | $\times 10^{-5}$ |
| 16 EB             | <b>1028</b> | <b>822</b> | <b>629</b> | <b>466</b> | <b>326</b> | <b>197</b> | <b>91</b>  | <b>16</b>  | <b>43</b> | <b>74</b>  | <b>97</b>  | 115        | $\times 10^{-5}$ |
| 17 MLE            | 1132        | 907        | 705        | 541        | 388        | 264        | 190        | 124        | 124       | 125        | 137        | 146        | $\times 10^{-5}$ |
| 17 VBEM           | 1132        | 907        | 705        | 541        | 389        | 265        | 191        | 125        | 126       | 128        | 140        | 149        | $\times 10^{-5}$ |
| 17 EB             | <b>1116</b> | <b>887</b> | <b>681</b> | <b>512</b> | <b>354</b> | <b>224</b> | <b>143</b> | <b>70</b>  | <b>82</b> | <b>102</b> | <b>129</b> | <b>144</b> | $\times 10^{-5}$ |
| 18 MLE            | 1097        | 905        | 733        | 583        | 458        | 348        | 247        | 161        | 137       | 142        | 141        | 164        | $\times 10^{-5}$ |
| 18 VBEM           | 1097        | 905        | 733        | 583        | 458        | 348        | 248        | 162        | 139       | 144        | 144        | 167        | $\times 10^{-5}$ |
| 18 EB             | <b>1082</b> | <b>886</b> | <b>709</b> | <b>553</b> | <b>423</b> | <b>307</b> | <b>199</b> | <b>107</b> | <b>81</b> | <b>96</b>  | <b>104</b> | <b>143</b> | $\times 10^{-5}$ |

**Table S2** – MSE values for model 2. The average MSE of the estimates  $\hat{\Theta}$  to  $\Theta$  by the three methods of the 100 graphs generated under different  $n$  are shown in each row. The input number of clusters  $K$  ranges from 1 to 12, for each  $n$  and  $K$  the minimal MSE among three methods is boldfaced.

| $n \setminus K$ | 1          | 2          | 3          | 4          | 5          | 6          | 7          | 8          | 9          | 10         | 11         | 12         |                  |
|-----------------|------------|------------|------------|------------|------------|------------|------------|------------|------------|------------|------------|------------|------------------|
| 200 MLE         | <b>229</b> | 225        | 225        | 229        | 236        | 238        | 247        | 256        | 266        | 269        | 273        | 283        | $\times 10^{-5}$ |
| 200 VBEM        | <b>229</b> | <b>221</b> | <b>219</b> | <b>222</b> | <b>225</b> | <b>230</b> | <b>236</b> | <b>240</b> | 251        | 255        | 260        | 269        | $\times 10^{-5}$ |
| 200 EB          | <b>229</b> | 224        | 224        | 227        | 233        | 233        | 239        | 243        | <b>250</b> | <b>250</b> | <b>251</b> | <b>258</b> | $\times 10^{-5}$ |
| 250 MLE         | <b>230</b> | 217        | 204        | 192        | 186        | 182        | 184        | 187        | 192        | 193        | 202        | 206        | $\times 10^{-5}$ |
| 250 VBEM        | <b>230</b> | <b>215</b> | <b>201</b> | <b>188</b> | <b>181</b> | <b>176</b> | <b>177</b> | <b>181</b> | 184        | 186        | 194        | 198        | $\times 10^{-5}$ |
| 250 EB          | <b>230</b> | 217        | 203        | 192        | 185        | 180        | 180        | <b>181</b> | <b>182</b> | <b>182</b> | <b>187</b> | <b>190</b> | $\times 10^{-5}$ |
| 300 MLE         | <b>231</b> | <b>208</b> | 186        | 165        | 147        | 130        | 121        | 120        | 118        | 124        | 128        | 133        | $\times 10^{-5}$ |
| 300 VBEM        | <b>231</b> | <b>208</b> | <b>185</b> | <b>164</b> | <b>145</b> | <b>128</b> | <b>119</b> | <b>117</b> | 114        | 120        | 123        | 128        | $\times 10^{-5}$ |
| 300 EB          | <b>231</b> | <b>208</b> | 186        | 165        | 147        | 130        | 120        | <b>117</b> | <b>113</b> | <b>117</b> | <b>119</b> | <b>123</b> | $\times 10^{-5}$ |
| 350 MLE         | <b>231</b> | <b>202</b> | 175        | 151        | 129        | 110        | 94         | 81         | 74         | 75         | 77         | 77         | $\times 10^{-5}$ |
| 350 VBEM        | <b>231</b> | <b>202</b> | <b>174</b> | <b>150</b> | <b>128</b> | <b>109</b> | <b>93</b>  | <b>80</b>  | <b>73</b>  | 73         | 76         | 76         | $\times 10^{-5}$ |
| 350 EB          | <b>231</b> | <b>202</b> | 175        | <b>150</b> | <b>128</b> | 110        | <b>93</b>  | <b>80</b>  | <b>73</b>  | <b>72</b>  | <b>73</b>  | <b>72</b>  | $\times 10^{-5}$ |
| 400 MLE         | <b>232</b> | <b>201</b> | 171        | <b>141</b> | <b>117</b> | 95         | 77         | 61         | 49         | 44         | 43         | 45         | $\times 10^{-5}$ |
| 400 VBEM        | <b>232</b> | <b>201</b> | <b>170</b> | <b>141</b> | <b>117</b> | 95         | 77         | <b>60</b>  | 48         | 44         | 42         | 44         | $\times 10^{-5}$ |
| 400 EB          | <b>232</b> | <b>201</b> | <b>170</b> | <b>141</b> | <b>117</b> | <b>94</b>  | <b>77</b>  | <b>60</b>  | <b>47</b>  | <b>43</b>  | <b>41</b>  | <b>42</b>  | $\times 10^{-5}$ |
| 450 MLE         | <b>232</b> | <b>199</b> | <b>167</b> | <b>139</b> | <b>114</b> | <b>91</b>  | <b>70</b>  | 52         | 36         | 25         | 26         | 28         | $\times 10^{-5}$ |
| 450 VBEM        | <b>232</b> | <b>199</b> | <b>167</b> | <b>139</b> | <b>114</b> | <b>91</b>  | <b>70</b>  | 52         | 36         | 25         | 26         | 27         | $\times 10^{-5}$ |
| 450 EB          | <b>232</b> | <b>199</b> | <b>167</b> | <b>139</b> | <b>114</b> | <b>91</b>  | <b>70</b>  | <b>51</b>  | <b>35</b>  | <b>24</b>  | <b>24</b>  | <b>26</b>  | $\times 10^{-5}$ |

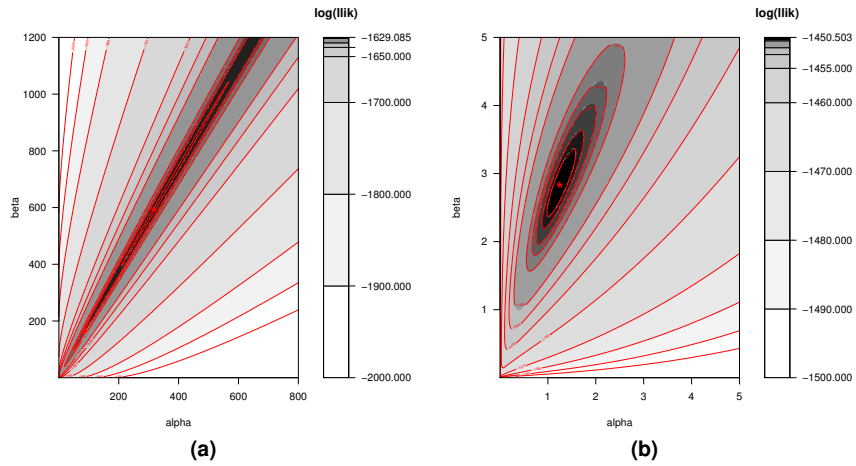

**Figure S2** – A typical contour plot of (a)  $\mathcal{L}(\alpha_0, \beta_0)$  and (b)  $\mathcal{L}(\alpha_1, \beta_1)$  from a graph generated by a SBM with  $n = 200$ ,  $K = 5$ ,  $\theta_{ab} = 0.7$  for  $a = b$  and  $\theta_{ab} = 0.3$  for  $a \neq b$ . The maximizers are marked as stars in the plots.

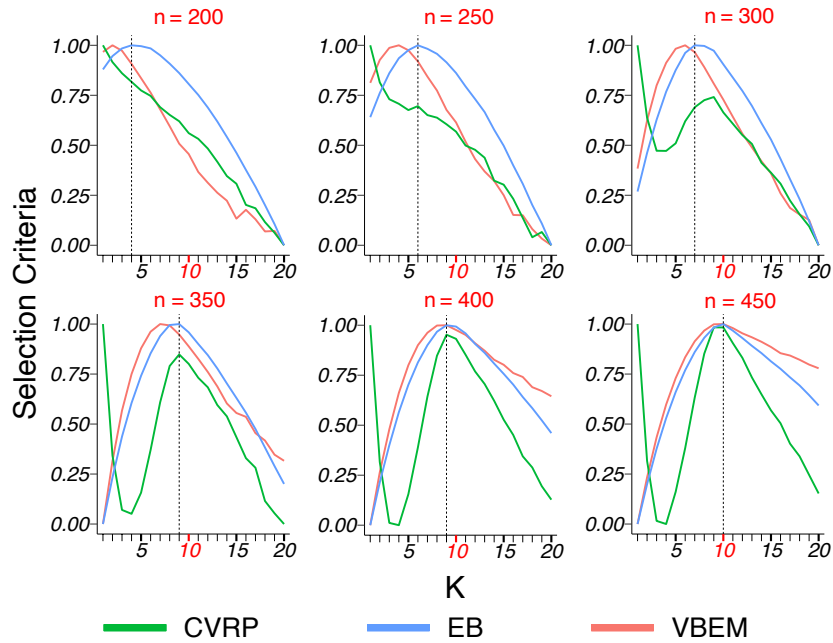

**Figure S3** – Values of model selection criteria in model 2 simulation. With the true number of blocks  $K^* = 10$  (marked as red), the number of network sizes  $n$  ranges from 200 to 450 and the results for graphs with each  $n$  are shown in a panel.  $\mathcal{I}_{\text{CVRP}}$ ,  $\mathcal{I}_{\text{VBEM}}$ ,  $\mathcal{I}_{\text{EB}}$  are all standardized to  $[0, 1]$ , and  $\mathcal{I}_{\text{CVRP}}$  is taken negative, thus the model is selected by the maximizer of each criterion. For the 100 graphs generated under each set of parameters, the values of three criteria are plotted against the input number of blocks  $K = 1, \dots, 20$  used in clustering. The number of clusters selected by EB is highlighted by the dashed lines.

**Table S3** – MSE values for model 3. The average MSE of the estimates  $\hat{\Theta}$  to  $\Theta$  by the three methods of the 100 graphs generated under different set of parameters  $\rho$  and  $\lambda$  are shown in each row. The input number of clusters  $K$  ranges from 1 to 10, for each  $\rho$ ,  $\lambda$  and  $K$  the minimal MSE among three methods is boldfaced.

| $\rho$      | $\lambda$ | 1    | 2          | 3          | 4          | 5          | 6          | 7          | 8          | 9          | 10         |            |                  |
|-------------|-----------|------|------------|------------|------------|------------|------------|------------|------------|------------|------------|------------|------------------|
| $10^{-1}$   | 2         | MLE  | <b>80</b>  | <b>26</b>  | 28         | 34         | 43         | 47         | 57         | 70         | 80         | 91         | $\times 10^{-4}$ |
|             |           | VBEM | 81         | 28         | 31         | 46         | 65         | 78         | 92         | 103        | 114        | 120        | $\times 10^{-4}$ |
|             |           | EB   | <b>80</b>  | <b>26</b>  | <b>26</b>  | <b>31</b>  | <b>38</b>  | <b>40</b>  | <b>46</b>  | <b>54</b>  | <b>58</b>  | <b>62</b>  | $\times 10^{-4}$ |
|             | 3         | MLE  | <b>229</b> | 78         | <b>47</b>  | 50         | 57         | 62         | 73         | 83         | 94         | 104        | $\times 10^{-4}$ |
|             |           | VBEM | 248        | 109        | 75         | 90         | 110        | 130        | 147        | 163        | 177        | 191        | $\times 10^{-4}$ |
|             |           | EB   | <b>229</b> | <b>77</b>  | <b>47</b>  | <b>48</b>  | <b>53</b>  | <b>58</b>  | <b>66</b>  | <b>73</b>  | <b>79</b>  | <b>84</b>  | $\times 10^{-4}$ |
|             | 5         | MLE  | <b>680</b> | <b>247</b> | <b>161</b> | <b>144</b> | <b>144</b> | 148        | 153        | 164        | 171        | 184        | $\times 10^{-4}$ |
|             |           | VBEM | 806        | 529        | 451        | 452        | 483        | 517        | 555        | 581        | 612        | 638        | $\times 10^{-4}$ |
|             |           | EB   | <b>680</b> | 248        | <b>161</b> | 145        | <b>144</b> | <b>145</b> | <b>150</b> | <b>158</b> | <b>163</b> | <b>171</b> | $\times 10^{-4}$ |
| $10^{-1.5}$ | 2         | MLE  | <b>8</b>   | <b>11</b>  | <b>13</b>  | 14         | 17         | 18         | 21         | 22         | 24         | 25         | $\times 10^{-4}$ |
|             |           | VBEM | 10         | 20         | 59         | 98         | 133        | 169        | 204        | 234        | 269        | 305        | $\times 10^{-4}$ |
|             |           | EB   | <b>8</b>   | <b>11</b>  | <b>13</b>  | <b>13</b>  | <b>15</b>  | <b>14</b>  | <b>14</b>  | <b>15</b>  | <b>16</b>  | <b>16</b>  | $\times 10^{-4}$ |
|             | 3         | MLE  | <b>23</b>  | <b>13</b>  | 16         | 19         | 24         | 28         | 32         | 34         | 40         | 42         | $\times 10^{-4}$ |
|             |           | VBEM | 32         | 25         | 63         | 102        | 132        | 166        | 202        | 236        | 265        | 304        | $\times 10^{-4}$ |
|             |           | EB   | <b>23</b>  | <b>13</b>  | <b>15</b>  | <b>15</b>  | <b>18</b>  | <b>19</b>  | <b>21</b>  | <b>21</b>  | <b>23</b>  | <b>23</b>  | $\times 10^{-4}$ |
|             | 5         | MLE  | <b>68</b>  | <b>30</b>  | 32         | 35         | 40         | 45         | 54         | 64         | 70         | 88         | $\times 10^{-4}$ |
|             |           | VBEM | 127        | 132        | 166        | 213        | 258        | 301        | 339        | 369        | 415        | 452        | $\times 10^{-4}$ |
|             |           | EB   | <b>68</b>  | <b>30</b>  | <b>30</b>  | <b>31</b>  | <b>33</b>  | <b>36</b>  | <b>39</b>  | <b>42</b>  | <b>45</b>  | <b>49</b>  | $\times 10^{-4}$ |
| $10^{-2}$   | 2         | MLE  | <b>82</b>  | 190        | 239        | 336        | 346        | 429        | 425        | 442        | 498        | 490        | $\times 10^{-6}$ |
|             |           | VBEM | 58         | 795        | 1525       | 2183       | 2821       | 3461       | 4098       | 4705       | 5248       | 5799       | $\times 10^{-5}$ |
|             |           | EB   | <b>82</b>  | <b>187</b> | <b>185</b> | <b>232</b> | <b>273</b> | <b>224</b> | <b>219</b> | <b>192</b> | <b>202</b> | <b>192</b> | $\times 10^{-6}$ |
|             | 3         | MLE  | <b>23</b>  | 44         | 53         | 58         | 68         | 71         | 68         | 73         | 74         | 67         | $\times 10^{-5}$ |
|             |           | VBEM | 127        | 889        | 1644       | 2397       | 3103       | 3814       | 4509       | 5164       | 5774       | 6413       | $\times 10^{-5}$ |
|             |           | EB   | <b>23</b>  | <b>43</b>  | <b>47</b>  | <b>48</b>  | <b>53</b>  | <b>52</b>  | <b>52</b>  | <b>53</b>  | <b>54</b>  | <b>43</b>  | $\times 10^{-5}$ |
|             | 5         | MLE  | <b>68</b>  | <b>136</b> | 153        | 160        | 173        | 165        | 174        | 171        | 160        | 166        | $\times 10^{-5}$ |
|             |           | VBEM | 413        | 1129       | 1998       | 2941       | 3804       | 4667       | 5413       | 6215       | 6943       | 7586       | $\times 10^{-5}$ |
|             |           | EB   | <b>68</b>  | 142        | <b>136</b> | <b>143</b> | <b>137</b> | <b>124</b> | <b>132</b> | <b>123</b> | <b>123</b> | <b>118</b> | $\times 10^{-5}$ |

**Table S4** – MSE values for model 4. The average MSE of the estimates  $\hat{\Theta}$  to  $\Theta$  by the three methods of the 100 graphs generated under different set of parameters  $\rho$  and  $\lambda$  are shown in each row. The input number of clusters  $K$  ranges from 1 to 10, for each  $\rho$ ,  $\lambda$  and  $K$  the minimal MSE among three methods is boldfaced.

| $\rho$      | $\lambda$ | 1    | 2          | 3          | 4          | 5          | 6         | 7         | 8         | 9         | 10         |            |                  |
|-------------|-----------|------|------------|------------|------------|------------|-----------|-----------|-----------|-----------|------------|------------|------------------|
| $10^{-1}$   | 2         | MLE  | <b>782</b> | <b>240</b> | <b>120</b> | 77         | 82        | 84        | 87        | 114       | 112        | 121        | $\times 10^{-5}$ |
|             |           | VBEM | 783        | 244        | 122        | 78         | 121       | 177       | 228       | 270       | 327        | 374        | $\times 10^{-5}$ |
|             |           | EB   | <b>782</b> | <b>240</b> | <b>120</b> | <b>76</b>  | <b>77</b> | <b>78</b> | <b>81</b> | <b>99</b> | <b>98</b>  | <b>103</b> | $\times 10^{-5}$ |
|             | 3         | MLE  | <b>225</b> | <b>69</b>  | <b>33</b>  | <b>20</b>  | <b>15</b> | <b>14</b> | 15        | 15        | 18         | 18         | $\times 10^{-4}$ |
|             |           | VBEM | 230        | 82         | 44         | 29         | 23        | 26        | 31        | 36        | 42         | 48         | $\times 10^{-4}$ |
|             |           | EB   | <b>225</b> | <b>69</b>  | <b>33</b>  | <b>20</b>  | <b>15</b> | <b>14</b> | <b>14</b> | <b>14</b> | <b>16</b>  | <b>16</b>  | $\times 10^{-4}$ |
|             | 5         | MLE  | <b>674</b> | <b>230</b> | <b>131</b> | <b>103</b> | <b>91</b> | <b>85</b> | <b>83</b> | <b>83</b> | 84         | 85         | $\times 10^{-4}$ |
|             |           | VBEM | 719        | 379        | 268        | 242        | 234       | 232       | 234       | 241       | 248        | 257        | $\times 10^{-4}$ |
|             |           | EB   | <b>674</b> | <b>230</b> | <b>131</b> | <b>103</b> | <b>91</b> | <b>85</b> | <b>83</b> | <b>83</b> | <b>83</b>  | <b>84</b>  | $\times 10^{-4}$ |
| $10^{-1.5}$ | 2         | MLE  | <b>78</b>  | <b>24</b>  | 21         | 22         | 28        | 32        | 39        | 45        | 52         | 78         | $\times 10^{-5}$ |
|             |           | VBEM | 80         | 26         | 32         | 138        | 242       | 342       | 450       | 512       | 623        | 686        | $\times 10^{-5}$ |
|             |           | EB   | <b>78</b>  | <b>24</b>  | <b>20</b>  | <b>21</b>  | <b>23</b> | <b>25</b> | <b>27</b> | <b>32</b> | <b>31</b>  | <b>37</b>  | $\times 10^{-5}$ |
|             | 3         | MLE  | <b>225</b> | <b>68</b>  | <b>33</b>  | 37         | 43        | 52        | 65        | 84        | 96         | 125        | $\times 10^{-5}$ |
|             |           | VBEM | 244        | 102        | 62         | 151        | 248       | 323       | 416       | 455       | 517        | 559        | $\times 10^{-5}$ |
|             |           | EB   | <b>225</b> | <b>68</b>  | <b>33</b>  | <b>35</b>  | <b>38</b> | <b>44</b> | <b>48</b> | <b>56</b> | <b>60</b>  | <b>67</b>  | $\times 10^{-5}$ |
|             | 5         | MLE  | <b>674</b> | <b>213</b> | <b>102</b> | 73         | 79        | 93        | 106       | 119       | 151        | 180        | $\times 10^{-5}$ |
|             |           | VBEM | 853        | 641        | 506        | 472        | 577       | 680       | 785       | 854       | 903        | 947        | $\times 10^{-5}$ |
|             |           | EB   | <b>674</b> | <b>213</b> | <b>102</b> | <b>72</b>  | <b>73</b> | <b>79</b> | <b>86</b> | <b>96</b> | <b>112</b> | <b>125</b> | $\times 10^{-5}$ |
| $10^{-2}$   | 2         | MLE  | <b>8</b>   | 8          | 15         | 15         | 17        | 18        | 20        | 22        | 20         | 18         | $\times 10^{-5}$ |
|             |           | VBEM | 10         | 20         | 176        | 305        | 476       | 626       | 778       | 915       | 1065       | 1250       | $\times 10^{-5}$ |
|             |           | EB   | <b>8</b>   | <b>8</b>   | <b>12</b>  | <b>11</b>  | <b>13</b> | <b>12</b> | <b>13</b> | <b>12</b> | <b>14</b>  | <b>12</b>  | $\times 10^{-5}$ |
|             | 3         | MLE  | <b>23</b>  | <b>9</b>   | 16         | 20         | 21        | 25        | 33        | 29        | 33         | 31         | $\times 10^{-5}$ |
|             |           | VBEM | 33         | 19         | 168        | 325        | 471       | 656       | 792       | 994       | 1121       | 1301       | $\times 10^{-5}$ |
|             |           | EB   | <b>23</b>  | <b>9</b>   | <b>11</b>  | <b>11</b>  | <b>14</b> | <b>14</b> | <b>15</b> | <b>15</b> | <b>18</b>  | <b>17</b>  | $\times 10^{-5}$ |
|             | 5         | MLE  | <b>67</b>  | <b>23</b>  | 35         | 39         | 44        | 60        | 70        | 88        | 105        | 130        | $\times 10^{-5}$ |
|             |           | VBEM | 124        | 120        | 196        | 358        | 523       | 655       | 829       | 984       | 1084       | 1277       | $\times 10^{-5}$ |
|             |           | EB   | <b>67</b>  | <b>23</b>  | <b>23</b>  | <b>26</b>  | <b>29</b> | <b>31</b> | <b>33</b> | <b>35</b> | <b>40</b>  | <b>42</b>  | $\times 10^{-5}$ |

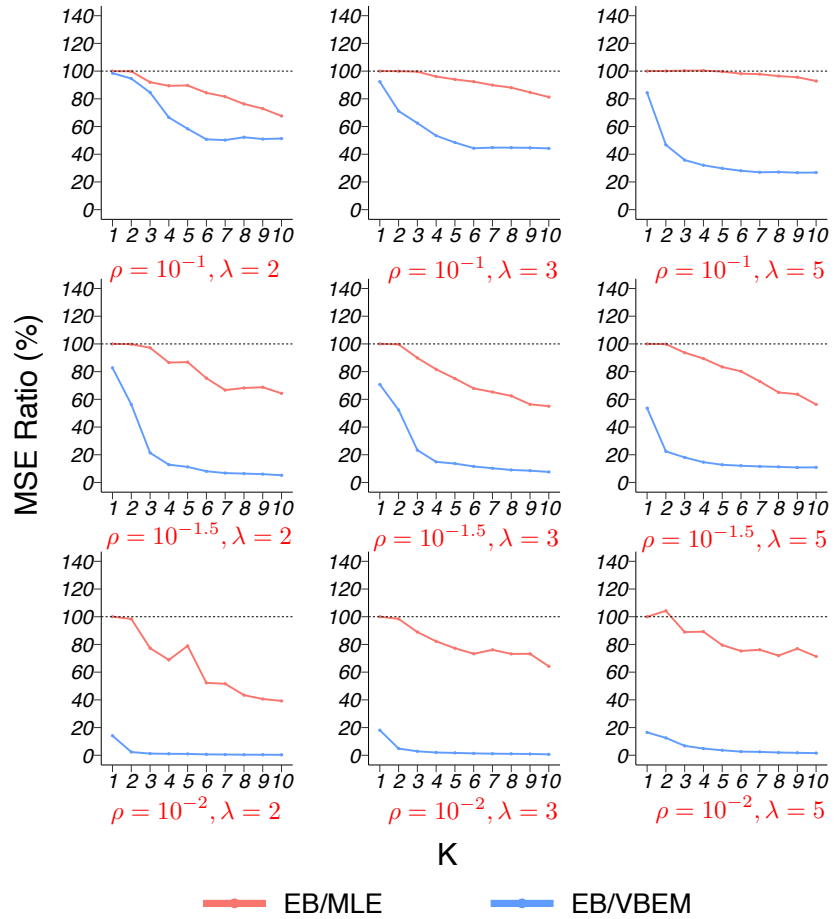

**Figure S4** – MSE ratios in model 3 simulation with graph size  $n = 100$ . The results for graphs with each combination of  $\rho$  and  $\lambda$  are shown in a panel.

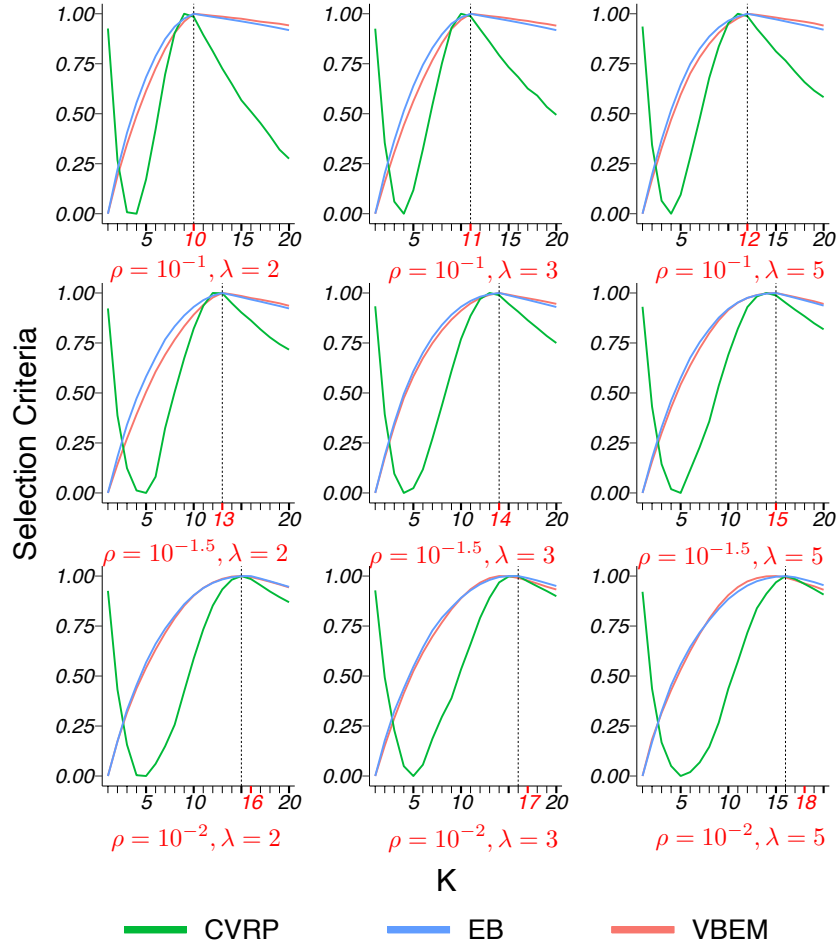

**Figure S5** – Values of model selection criteria in model 3 simulation. Graph size (number of nodes)  $n = 100$ . With the graphon  $W(x, y) = \rho \lambda^2 (xy)^{\lambda-1}$ ,  $\rho \in \{10^{-1}, 10^{-1.5}, 10^{-2}\}$  and  $\lambda \in \{2, 3, 5\}$ , the results for graphs with each set of parameters  $\rho$  and  $\lambda$  are shown in a panel.  $\mathcal{I}_{\text{CVRP}}$ ,  $\mathcal{I}_{\text{VBEM}}$ ,  $\mathcal{I}_{\text{EB}}$  are all standardized to  $[0, 1]$ , and  $\mathcal{I}_{\text{CVRP}}$  is taken negative, thus the model is selected by the maximizer of each criterion. For the 100 graphs generated under each set of parameters, the values of three criteria are plotted against the input number of blocks  $K = 1, \dots, 10$  used in clustering. The number of clusters selected by EB is highlighted by the dashed lines.

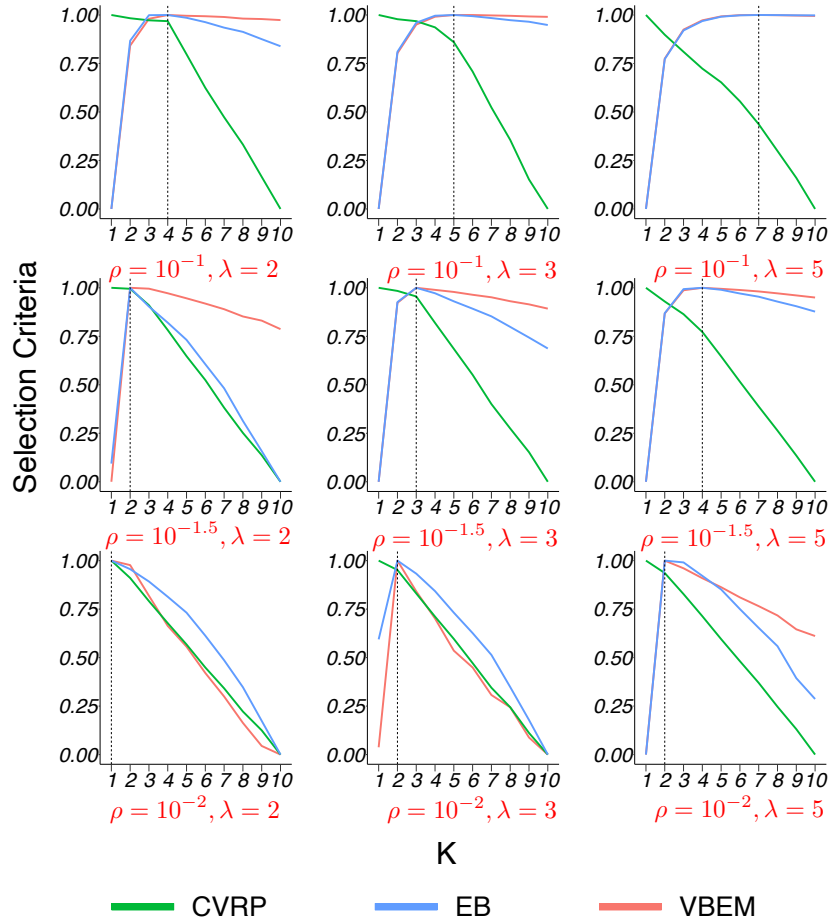

**Figure S6** – Values of model selection criteria in model 4 simulation. Graph size (number of nodes)  $n = 316$ . With the graphon  $W(x, y) = \rho \lambda^2 (xy)^{\lambda-1}$ ,  $\rho \in \{10^{-1}, 10^{-1.5}, 10^{-2}\}$  and  $\lambda \in \{2, 3, 5\}$ , the results for graphs with each set of parameters  $\rho$  and  $\lambda$  are shown in a panel.  $\mathcal{I}_{\text{CVRP}}$ ,  $\mathcal{I}_{\text{VBEM}}$ ,  $\mathcal{I}_{\text{EB}}$  are all standardized to  $[0, 1]$ , and  $\mathcal{I}_{\text{CVRP}}$  is taken negative, thus the model is selected by the maximizer of each criterion. For the 100 graphs generated under each set of parameters, the values of three criteria are plotted against the input number of blocks  $K = 1, \dots, 10$  used in clustering. The number of clusters selected by EB is highlighted by the dashed lines.



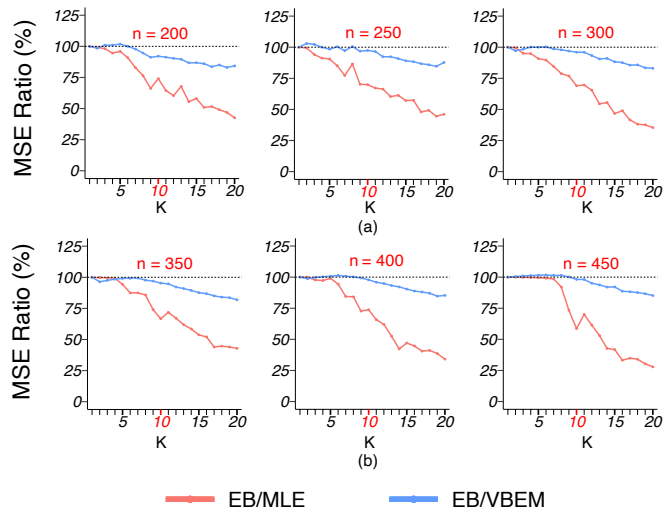

**Figure S7** – MSE ratios in model 2s simulation. The true number of blocks  $K^*$  (marked in red) ranges from 10 to 18 and the results for graphs with each  $K^*$  are shown in a panel. For the 100 graphs generated under each  $K^*$ , the MSE ratios of the estimates  $\hat{\Theta}_{MLE}$  and  $\hat{\Theta}_{VBEM}$  over  $\hat{\Theta}_{EB}$  are plotted against the input number of blocks  $K$  chosen in the clustering step.

**Table S5** – Model selection comparison for model 2s among the  $\hat{K}$  chosen by (a) CVRP, (b) VBEM, and (c) EB. (Each row in a table reports the frequency of  $\hat{K}$  across 100 graphs. The last two columns report two mean absolute deviations, the minimum of which among the three methods is in red for each  $K^*$ .)

| (a) CVRP              |     |   |   |   |   |   |   |   |   |    |    |    |    |    |    |           |               |
|-----------------------|-----|---|---|---|---|---|---|---|---|----|----|----|----|----|----|-----------|---------------|
| $n \setminus \hat{K}$ | 1   | 2 | 3 | 4 | 5 | 6 | 7 | 8 | 9 | 10 | 11 | 12 | 13 | 14 | 15 | $E_{K^*}$ | $E_{\hat{K}}$ |
| 200                   | 100 |   |   |   |   |   |   |   |   |    |    |    |    |    |    | 9.00      | 0.20          |
| 250                   | 100 |   |   |   |   |   |   |   | 5 | 20 | 27 | 10 | 3  |    | 1  | 9.00      | 1.11          |
| 300                   | 99  | 1 |   |   |   |   |   |   |   |    |    |    |    |    |    | 8.99      | 3.62          |
| 350                   | 99  | 1 |   |   |   |   |   |   |   |    |    |    |    |    |    | 8.99      | 7.14          |
| 400                   | 100 |   |   |   |   |   |   |   |   |    |    |    |    |    |    | 9.00      | 9.25          |
| 450                   | 89  | 1 |   |   |   |   |   |   | 2 | 8  |    |    |    |    |    | 8.11      | 10.44         |

  

| (b) VBEM              |    |    |    |    |    |    |    |    |    |    |    |    |    |    |    |           |               |
|-----------------------|----|----|----|----|----|----|----|----|----|----|----|----|----|----|----|-----------|---------------|
| $n \setminus \hat{K}$ | 1  | 2  | 3  | 4  | 5  | 6  | 7  | 8  | 9  | 10 | 11 | 12 | 13 | 14 | 15 | $E_{K^*}$ | $E_{\hat{K}}$ |
| 200                   | 87 | 13 |    |    |    |    |    |    |    |    |    |    |    |    |    | 8.87      | 0.25          |
| 250                   | 61 | 35 | 3  | 1  |    |    |    |    |    | 5  | 20 | 27 | 10 | 3  | 1  | 8.56      | 1.03          |
| 300                   | 28 | 33 | 30 | 6  | 3  |    |    |    |    |    |    |    |    |    |    | 7.77      | 2.62          |
| 350                   | 3  | 10 | 26 | 33 | 16 | 7  | 3  | 2  |    |    |    |    |    |    |    | 6.08      | 4.25          |
| 400                   | 1  | 1  | 7  | 17 | 30 | 21 | 11 | 6  | 4  | 2  |    |    |    |    |    | 4.51      | 4.80          |
| 450                   |    |    |    |    | 4  | 16 | 27 | 28 | 15 | 7  | 2  |    |    | 1  |    | 2.41      | 4.68          |

  

| (c) EB                |    |    |    |    |    |    |    |    |   |    |    |    |    |    |    |           |               |      |
|-----------------------|----|----|----|----|----|----|----|----|---|----|----|----|----|----|----|-----------|---------------|------|
| $n \setminus \hat{K}$ | 1  | 2  | 3  | 4  | 5  | 6  | 7  | 8  | 9 | 10 | 11 | 12 | 13 | 14 | 15 | $E_{K^*}$ | $E_{\hat{K}}$ |      |
| 200                   | 96 | 4  |    |    |    |    |    |    |   |    |    |    |    |    |    | 8.96      | 0.24          |      |
| 250                   | 91 | 7  | 2  |    |    |    |    |    |   |    |    |    |    |    |    | 8.89      | 1.04          |      |
| 300                   | 17 | 78 | 3  | 1  | 1  |    |    |    |   |    |    |    |    |    |    | 7.69      | 2.42          |      |
| 350                   |    | 4  | 15 | 23 | 37 | 8  | 5  | 3  | 3 | 2  |    |    |    |    |    | 5.16      | 4.09          |      |
| 400                   |    |    | 1  | 2  | 2  | 10 | 17 | 18 | 8 | 8  | 9  | 5  | 12 | 11 |    | 2.92      | 4.67          |      |
| 450                   |    |    |    |    |    |    |    | 2  | 3 | 11 | 13 | 17 | 11 | 14 | 16 | 13        | 2.33          | 4.06 |

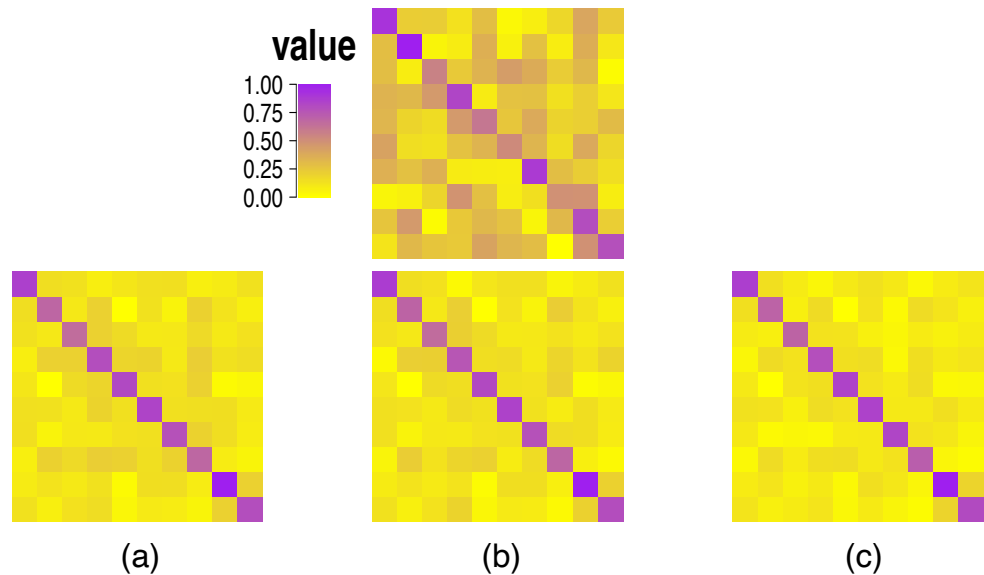

**Figure S8** – Heatmaps of connectivity matrix and estimates in model 1s (heterogeneous SBM) when  $K^* = K = 10$ . The top heatmap shows the connectivity of the true SBM. The bottom panels show the estimated connectivity matrices by (a) MLE, (b) VBEM, and (c) EB. All three methods have similar estimates without substantial deviation from the truth.

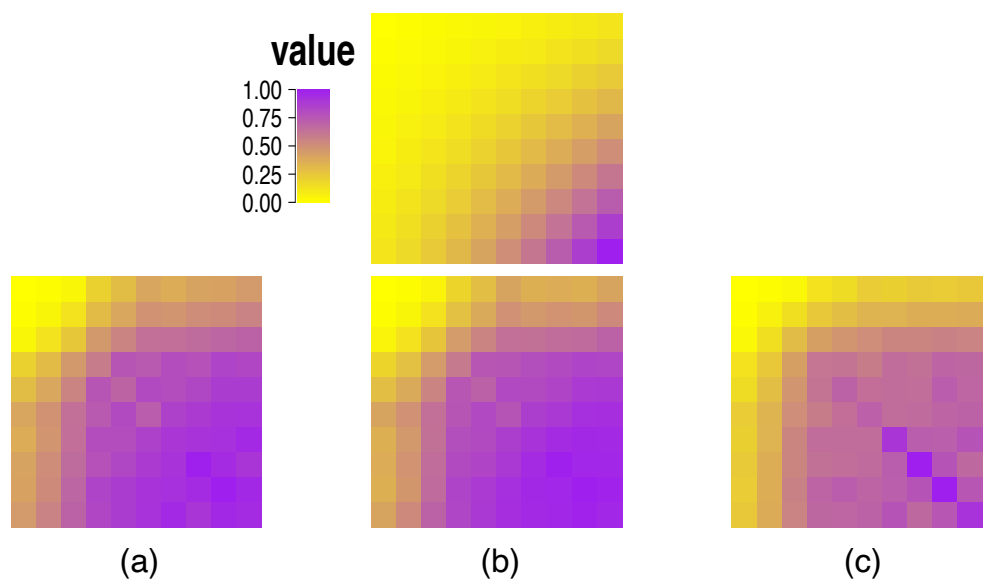

**Figure S9** – Heatmaps of approximated connectivity matrix and estimates in model 3 (graphon) with  $\rho = 10^{-1}$  and  $\lambda = 3$ . The top heatmap shows the value of the graphon function approximated by a  $10 \times 10$  matrix. The bottom panels show the estimated connectivity matrices with  $K = 10$  by (a) MLE, (b) VBEM, and (c) EB. All three methods tend to overestimate the connectivity of many blocks, while EB is the one that has relatively closer values to the truth.

10 **REFERENCES**

- 11 Beal, M. and Ghahramani, Z. (2003). The variational bayesian em algorithm for incomplete data : with  
12 application to scoring graphical model structures. *Bayesian Statistics*, 7:453–464.
- 13 Daudin, J.-J., Picard, F., and Robin, S. (2008). A mixture model for random graphs. *Statistics and*  
14 *Computing*, 18(2):173–183.
- 15 Latouche, P., Birmele, E., and Ambroise, C. (2012). Variational bayesian inference and complexity control  
16 for stochastic block models. *Statistical Modelling*, 12(1):93–115.
